# Supplementary material for: Recyclable Sonogashira coupling reactions in an ionic liquid, effected in the absence of both a copper salt and a phosphineElectronic supplementary information (ESI) available: experimental details. See http://www.rsc.org/suppdata/cc/b4/b402477j/
Source: Royal Society of Chemistry journal article supplement (doi:10.1039/b402477j), 2004-01-01
Supplement: b402477j.doc [file b402477j.doc]

**Recyclable Sonogashira Coupling Reactions in an Ionic Liquid, Effected in the Absence of Both a Copper Salt and a Phosphine**

Soon Bong Park and Howard Alper*

# Centre for Catalysis Research and Innovation

Department of Chemistry, University of Ottawa, 10 Marie Curie

Ottawa, Ontario, Canada, K1N 6N5

Submitted for publication to *Chemical Communication.*

### Supporting Information

# **Mailing Address :** Centre for Catalysis Research and Innovation

Department of Chemistry, University of Ottawa, 10 Marie Curie

Ottawa, Ontario, Canada, K1N 6N5

Telephone : (613) –562-5189

Fax : (613) –562-5871

E-mail : halper@uottawa.ca

**Subject : XXXXXXX**

**Experimental Procedures**

**General.** Unless otherwise indicated, all starting materials were obtained from commercial suppliers (Aldrich, Lancaster, Strem, EM Science) and were used without further purification. THF was distilled over sodium/benzophenone; dichloromethane was distilled over calcium hydride prior to use. All reactions were performed under an atmosphere of dry nitrogen. Analytical thin-layer chromatography (TLC) was performed on silica gel 60 F254 pre-coated aluminum sheets from EM Science. Visualization was performed with a 254 nm ultraviolet lamp. Silica gel column chromatography was carried out with silica gel (60, 230-400 mesh) from EM Science. The 1H and 13C NMR spectra were recorded on a Varian Gemini 200 MHz and a Bruker 300 MHz spectrometer. Chemical shifts were recorded in ppm () relative to tetramethylsilane (TMS), and *J* values are given in Hertz. Chemical shifts in the 13C NMR were measured relative to CDCl3. Infrared spectra were recorded on a Shimadzu FTIR-8400S spectrophotometer and are recorded in wavenumbers (cm –1). Mass spectra were obtained on a VG 7070E spectrometer. The ionic liquid, [bmim][PF6]1, was prepared according to the reported procedure. All products are known compounds and were identified by 1H NMR, 13C NMR, MS and IR by comparison with literature data.

#### Synthetic Procedure for the Bisimidazole Ligand

In a 50 mL of round bottom flask was dissolved N-methylimidazole (410 mg, 3 mmol) in 20 mL of THF. After being cooled to –30 oC, methyl lithium (1.6 M solution, 2.4 mL) was added dropwise for 20 min. and then the mixture was stirred for 30 min. Iodine (910 mg, 3.6 mmol) was added to the reaction mixture in one portion. The temperature was slowly increased to room temperature, and stirring was continued for an additional 4 h. Saturated sodium thiosulfate (5 mL) was added and then the product was extracted with 10 mL of methylene chloride (3 times). The organic layer was dried with magnesium sulfate, and then subjected to rotary evaporator. The desired product was isolated by silica gel column chromatography as an off-white solid (560 mg).

(Rf = 0.65, CH2Cl2 : MeOH = 10 :1) 1H NMR (200 MHz, CDCl3) : 3.58 (s, 3H), 6.95 (s, 1H), 7.05 (s, 1H), 13C ( 200MHz, CDCl3) : 34.14, 120.42, 125.64, 135.44; EI MS (m/z) 208 [M+].

In a 50 mL round bottom flask was dissolved 2-iodo-N-methylimidazole (1030 mg, 5 mmol) and copper metal (630 mg, 10 mmol) in 10 mL of DMF. The reaction mixture was refluxed for 2 h., cooled to room temperature, and then poured into 50 mL of water. The reaction mixture was extracted with dichloromethane (20 mL X 3) and then dried over magnesium sulfate, filtered, and concentrated by rotary evaporation. The desired product was isolated by silica gel column chromatography as an off-white solid (320 mg). (Rf = 0.44, CH2Cl2: MeOH = 10:1) 1H NMR (200 MHz, CDCl3) : 4.01 (s, 3H), 6.85 (s, 1H), 7.05 (s, 1H), 13C ( 200MHz, CDCl3) : 35.14, 122.43, 127.61, 138.44; EI MS (m/z) 162 [M+].

#### General Procedure for the catalyst synthesis of 1

Bis-N-methylimidazole (65 mg, 0.4 mmol) and (cod)PdCl(CH3)2(106 mg, 0.4 mmol) were dissolved in 10 mL of DMC. After stirring for 2 hat room temperature, the reaction mixture was filtered with Celite. The remaining organic layer was concentrated *in vacuo*. The resulting solid was washed with anhydrous ethyl ether (10 mL X 3). The solid was dried *in vacuo* overnight (122 mg). 1H NMR (200 MHz, CDCl3) : 0.76 (s, 3H), 4.01-4.08 (q, J= 18.67 Hz, 6H), 6.78-6.87 (m, 3H), 7.19 (d, J= 1.4 Hz, 1H), 13C ( 300MHz, DMSO-d6) : 0.52, 36.20, 36.74, 123.68, 124.49, 125.11, 130.17, 130.29, 134.97, 137.21; EI MS (m/z) 318[M+].

**General Procedure for the coupling reaction of iodoarenes with acetylenes**.

In a 20 mL of round bottom flask was placed [bmim][PF6] ( 2 mL) and **1** (6.4 mg, 0.02 mmol). The solution was degassed under reduced pressure at 80 oC for 30 min, and then nitrogen gas was introduced. To the solution was added piperidine (0.15 mL, 1.5 mmol), 4-iodoanisole (234 mg, 1mmol) and phenylacetylene(0.14 mL, 1.25 mmol), and the resulting mixture was heated, using an oil bath, at 120 oC (bath temp.) for 1 h. The product was extracted from the reaction mixture by addition of ethyl ether (10 mL), followed by decantation of an ethyl ether solution of the product. This was repeated three times and the ammonium salt was removed by extraction with water (5 mL X 2). The combined organic layer was concentrated by rotary evaporation. The desired product was isolated by short-path silica gel column chromatography. The identity of the Sonogashira coupling products was confirmed by comparison with spectroscopic data reported in the literature.

**Diphenylacetylene**2 (Rf = 0.32, hexane) 1H NMR (CDCl3, 200 MHz) 7.25-7.35 (m. 6H), 7.45-7.55 (m, 4H); 13C NMR (CDCl3, 100 MHz) 89.35, 123.2, 128.24, 128.33, 131.59; EI MS (m/z) 178[M+], IR 3060, 2961, 1559, 1493, 1443, 1254, 1071, 756, 686.

**4-(phenylethynyl)anisole**2 (Rf = 0.38, hexane/ethyl acetate = 20/1) 1H NMR (CDCl3, 200 MHz) 3.75 (3, 3H), 6.80 (d, *J* = 8.7 Hz, 2H), 7.20-7.30 (m, 3H), 7.39 (d, *J* = 2.3 Hz, 2H), 7.42 (dd, *J* = 8.7, 0.6 Hz, 2H); 13C NMR (CDCl3, 100 MHz) 55.22, 88.04, 89.36, 113.96, 115.33, 123.57, 127.89, 128.26, 131.40, 133.00, 159.58; EI MS (m/z) 208[M+],

IR 2214, 1593, 1248, 1175, 1138, 837, 756, 690.

**4-(phenylethynyl)acetophenone**3 (Rf = 0.40, hexane/ethyl acetate = 7/1) 1H NMR (CDCl3, 200 MHz) 2.61 (s, 3H), 7.30-7.40 9m, 3H), 7.51-7.58 (m, 3H), 7.60 (d, *J* = 7.8 Hz, 2H), 7.93 (d, *J* = 7.8 Hz, 2H); 13C NMR (CDCl3, 100 MHz) 26.60, 88.59, 92.70, 122.64, 128.25, 128.47, 128.79, 131.68, 131.72, 136.19, 197.26; EI MS (m/z) 220[M+], IR 2218, 1680, 1603, 1263, 835, 760.

.

**2-(phenylethynyl)thiophene**4 (Rf = 0.40, hexane) 1H NMR (CDCl3, 200 MHz) 7.01 (dd, *J* = 4.8, 3.9 Hz, 1H), 7.26-7.30 (m, 2H), 7.31-7.37 (m, 3H), 7.49-7.53 (m, 2H); 13C NMR (CDCl3, 100 MHz) 82.62, 93.02, 127.05, 127.20, 128.32, 128.37, 131.36, 131.84; EI MS (m/z) 184[M+], IR 3100, 2201, 1595, 1485, 1423, 1213, 853, 833, 754.

**4-(phenylethynyl)toluene**2 (Rf = 0.33, hexane) 1H NMR (CDCl3, 200 MHz) 2.36 (s, 3H) 7.15 (d, *J* = 7.8 Hz, 2H) 7.30-7.38 (m, 3H), 7.42 (d, *J* = 8.2 Hz, 2H), 7.53 (dd, *J* = 7.8, 1,6 Hz); 13C NMR (CDCl3, 100 MHz) 21.35, 88.73, 89.58, 120.3, 123.41, 127.96, 128.22, 129.03, 131.40, 131.44, 138.22; EI MS (m/z) 192[M+], IR 3060, 2214, 1593, 1510, 1441, 818, 756, 691.

**4-(phenylethynyl)nitrobenzene**5 (Rf = 0.40, hexane/ethyl acetate = 15/1) 1H NMR (CDCl3, 200 MHz) 7.36-7.42 (m, 3H), 7.35-7.57 (m, 2H), 7.66 (d, *J* = 8.7 Hz, 2H), 8.21 (d, *J* =, 8.7 Hz, 2H); 13C NMR (CDCl3, 100 MHz) 87.51, 94.64, 122.03, 123.54, 128.47, 129.21, 130.60, 131.77, 132.17, 146.88; EI MS (m/z) 223[M+], IR 2216, 1591, 1510, 1337, 1346, 858, 766, 689.

**3-Phenyl-2-propyn-1-ol**4 (Rf = 0.28, hexane/ethyl acetate = 4/1) 1H NMR (CDCl3, 200 MHz) 1.71 (bs, 1H), 4.43 (s, 2H), 7.20-7.30 (m, 3H), 7.35-7.42 (m. 2H); 13C NMR (CDCl3, 100 MHz) 51.24, 85.35, 87.27, 122.48, 128.17, 128.30, 131.54; EI MS (m/z) 132[M+], IR 3326, 2240, 1489, 1442, 1032, 999, 952, 758, 693.

#### References

1. J. G. Huddleston, H. D. Willauer, R. P. Swatloski, A. E. Visser, R. D. Rogers, *J. Chem. Soc., Chem. Commun.,* 1998, 1765.
2. V. Mouries, R. Waschbusch, J. Carran, P. Savignac, *Synthesis* 1998, 271.
3. S. Thorand, N. Krause, *J. Org. Chem*. 1998, **63**, 8551.
4. S.-K. Kang, W.-Y. Kim, X. Jiao, *Synthesis* 1998, 1252.
5. K. Okuro, M. Furuune, M.Enna, M. Miura, M. Nomura, *J. Org. Chem*. 1993, **58**, 4716.
